1 **The most efficient microbial community dominates during community coalescence**

2

3 Pawel Sierocinski<sup>1</sup>, Kim Milferstedt<sup>2</sup>, Florian Bayer<sup>1</sup>, Tobias Großkopf<sup>3</sup>, Mark Alston<sup>4</sup>, Sarah  
4 Bastkowski<sup>4</sup>, David Swarbreck<sup>4</sup>, Phil J Hobbs<sup>5</sup>, Orkun S Soyer<sup>3</sup>, Jérôme Hamelin<sup>2</sup>, Angus  
5 Buckling<sup>1</sup>

6

7 <sup>1</sup> *Biosciences, University of Exeter, Penryn, Cornwall, TR10 9FE, UK*

8 <sup>2</sup> *LBE, INRA, 11100, Narbonne, France*

9 <sup>3</sup> *School of Life Sciences, University of Warwick, Coventry, UK*

10 <sup>4</sup> *Earlham Institute, Norwich Research Park, Norwich, NR4 7UH, UK*

11 <sup>5</sup> *Anaerobic Analytics Ltd, Okehampton, EX20 1AS, UK*

12

13 **ABSTRACT**

14

15 **Immigration has major impacts on both the structure and function of microbial**  
16 **communities(1, 2) and evolutionary dynamics of populations(3). While most work on**  
17 **immigration in microbial ecology deals with relatively low numbers and diversity of**  
18 **immigrants, this does not capture the natural context, which frequently involves the**  
19 **coalescence of entire communities(4, 5). The consequences, if any, of such community**  
20 **coalescence are unclear, although existing theoretical(6–9) and empirical(10–13)**  
21 **studies suggest coalescence can lead to single communities dominating resulting**  
22 **communities. A recent extension(9) of classical ecological theory(14, 15) may provide**  
23 **a simple explanation for such dominance: communities that exploit niches more fully**  
24 **and efficiently prevent species from other communities invading. Here, we test this**  
25 **prediction using complex anaerobic microbial communities, for which methane**  
26 **production is a measure of resource use efficiency at the community scale(16). We**  
27 **found that the communities, which were most efficient methane producers when**  
28 **grown in isolation, dominated when multiple distinct communities were coalesced. As**  
29 **expected from this dominance effect, the total methane production increased with**  
30 **increased number of distinct communities mixed and was linked with the methane**

31 **production of the most productive community. These results are likely to be relevant to**  
32 **the ecological dynamics of natural microbial communities, as well as demonstrating a**  
33 **simple method to predictably enhance microbial community function in biotechnology,**  
34 **health(17) and agriculture(18).**

35

36 Anaerobic digestion is a multi-stage process carried out by highly diverse bacterial and  
37 archaeal communities. Methanogenesis is the final stage of the process and results from the  
38 conversion of H<sub>2</sub>, CO<sub>2</sub> and short chain fatty acids produced by hydrolysis and fermentation of  
39 more complex organic material(16). It is carried out exclusively by methanogenic Archaea  
40 and is the only thermodynamically feasible way of actively removing inhibitory end-  
41 metabolites under many conditions where anaerobic digestion occurs(16). Methane  
42 production can therefore be a useful proxy of the ability of an anaerobic community to fully  
43 exploit available resources, and should correlate with community-level productivity. As such,  
44 methanogenic communities provide an ideal system to investigate the interplay between  
45 community productivity and community coalescence.

46

47 An emerging hypothesis(9) from classical ecological theory(14, 15) is that community  
48 coalescence can result in the mixed system being dominated by the single community that  
49 was the most productive prior to coalescence. We tested this hypothesis by determining the  
50 methane production and composition of two natural methanogenic communities grown in  
51 isolation or as a mixture in laboratory scale Anaerobic Digestors (ADs) over 5 weeks. To  
52 remove any confounding effects caused by differences in starting density of tested  
53 communities, we standardized microbial density based on qPCR-estimated counts of 16S  
54 rDNA copies. We found that the methane production of the mixed community was initially  
55 intermediate between the two individual communities, but soon started to produce gas at a  
56 rate indistinguishable from the more productive of the individual communities (Figure 1A). The  
57 composition of the mixed community was initially a hybrid of the two communities propagated  
58 in isolation but at the end of the experiment it most closely resembled the best performing  
59 individual community (Figure 1B). These results suggest that the most productive community  
60 dominates the mixed community, thus enhancing productivity beyond the average of its  
61 individual community components. Note that this conclusion is based on considering  
62 community composition based solely on the presence and absence of specific taxa: when the  
63 proportional weight of the community members was considered, the composition of the  
64 mixture was more intermediate between the endpoint individual communities.

65

66  
67  
68  
69  
70  
71

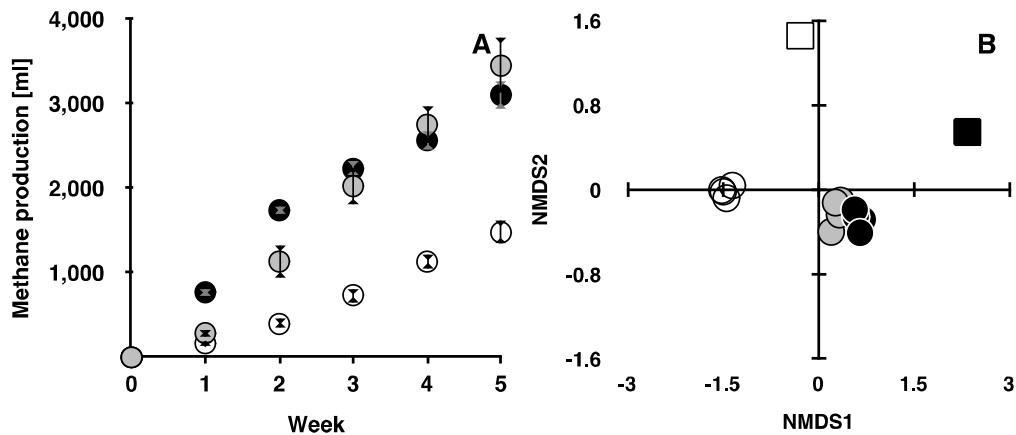

72

73 Figure 1: Methane production predicts the composition when two communities coalesce. A)  
74 Cumulative methane production in ml ( $\pm$ SEM) over time of: community P01 (white circles),  
75 community P05 (black circles) and their mixes (grey circles). Cumulative methane production  
76 differed between treatments ( $F_{2,9} = 23.2$ ,  $P < 0.001$ ), but did not differ between the mixed  
77 community and P05 (Tukey-Kramer HSD:  $P = 0.5$ ). P01 was lower than both other treatments  
78 ( $P < 0.001$  in both cases). B) NMDS plot of unweighted UniFrac of communities P01 (white),  
79 P05 (black) and their mixes (grey). Ancestral samples are represented by squares with  
80 samples from the endpoint of the experiment by circles. At the endpoint, P05 was  
81 compositionally more similar to the mixtures than P01, based on both unweighted (mean  
82 distance to each mixture for each replicate single community:  $t_6 = 8.3$ ,  $P < 0.001$ ) and  
83 weighted ( $t_6 = 2.3$ ,  $P = 0.03$ ) UniFrac distances.

84

85 To see if the results from coalescing two communities can be generalized, we next  
86 investigated the effect of mixing ten distinct communities. Methane production in mixed  
87 communities was higher than the average of the individual communities, but did not differ  
88 from the best performing single community (Figure 2A). The community composition in ten

89 replicated mixtures varied little and most closely resembled the highest performing community  
90 (Figure 2B). More generally, the higher the methane production of an individual community,  
91 the more similar was its composition to the mixtures (Figure 2C).  
92

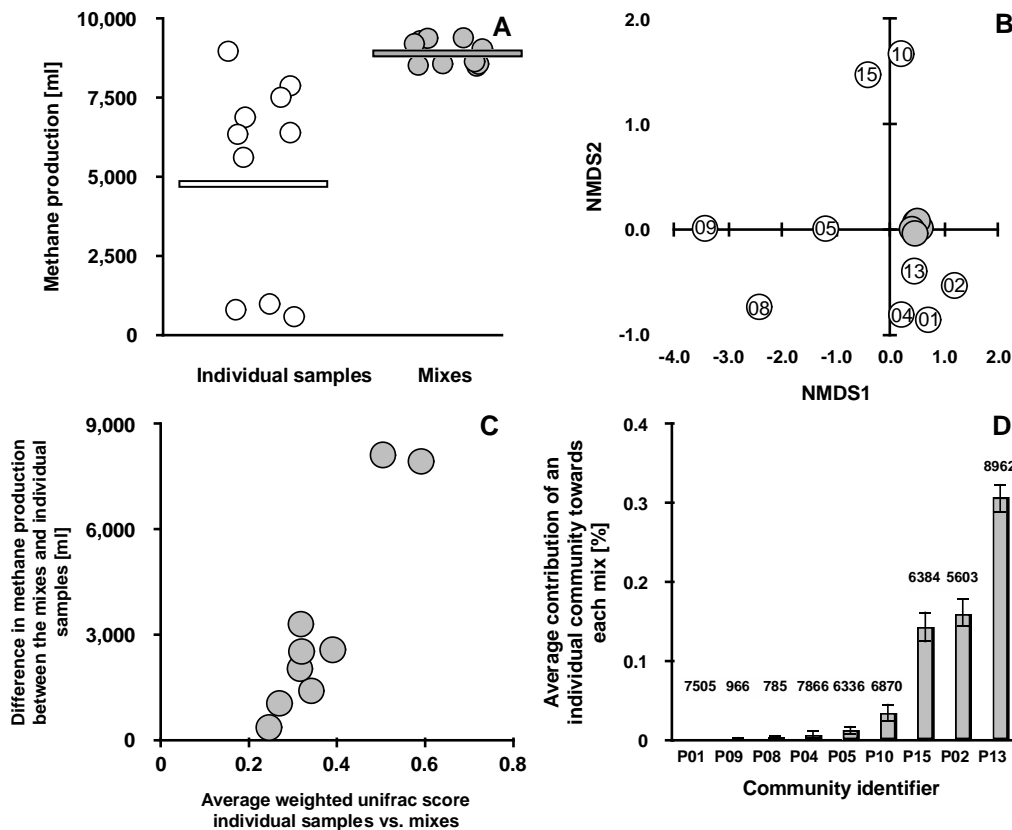

93  
94 Figure 2: Methane production predicts the greatest contributor to coalesced community  
95 composition. A) Cumulated methane production of Mixed (grey) and Individual communities  
96 (white). The average performance is shown as a horizontal line. Mean cumulative methane  
97 production was greater for mixtures than for most individual communities ( $t$ -test:  $P < 0.001$  in  
98 9 cases), but did not differ from community P13, which was the best performing community.  
99 B) NMDS plot of unweighted unifracs of 10 mixed (grey) and 9 individual communities (white).  
100 Numbers in circles refer to individual community identifiers (Table 1). Community 13, the  
101 highest methane producer shown in A, was significantly closer in composition to the 10 mixed  
102 communities than all other communities based on both weighted and unweighted UniFrac  
103 distances (Paired  $t$ -tests;  $P < 0.001$ , in all cases). Note that we failed to extract the DNA for  
104 sequencing from the community P06 (lowest methane producer) so it is not included in this

105 and following graphs. C) Relationship between an individual community's similarity to the  
106 mixed communities in terms of methane production (here shown as a difference between the  
107 average of the mixes and individual sample) and community composition (weighted UniFrac;  
108 Spearman  $\rho = 0.86$ ,  $P < 0.001$ ). Note that same correlation stands for unweighted UniFrac  
109 (Spearman  $\rho = 0.75$ ,  $P < 0.02$ ). D) Estimated percentage contribution of each individual  
110 community towards the 10 coalesced communities ( $\pm$ SEM). Values over the bars indicate  
111 methane production of each individual community over the course of the experiment [m].

112

113 We used a non-negative least squares (NNLS) approach to estimate the actual contribution of  
114 each community to the mixtures, rather than just the degree of similarity between mixtures  
115 and communities. This confirmed that the most productive community contributed the most to  
116 the composition of the mixture (Figure 2D). However, other productive communities (notably  
117 communities P01 and P04) contributed very little to the final composition. One possible  
118 explanation for this is that these communities were very similar in composition to the most  
119 productive community and hence could not occupy the same ecological niches in the mixed  
120 community (Figure 2D). In summary, even when mixing multiple communities together, the  
121 community that is the most productive in isolation makes the greatest contribution to both the  
122 composition and community level phenotype (i.e., methane production) of the mixture.

123

124 There are two non-mutually exclusive explanations for the link between methane production  
125 and contribution to coalesced communities. First, competitive interactions could override any  
126 other ecological drivers and individual species in more productive communities are on  
127 average more competitive and more productive than their ecological equivalents in other  
128 communities(8). Second, community level properties, such as the efficiency of niche  
129 packing(14), mutualistic interactions(19, 20) and interactions with consumers, such as  
130 viruses(21) determine a community's contribution in a mixture and best performing  
131 communities are simply dominating on the basis of these community level properties. Note  
132 that the importance of community-level characteristics does not invoke any "higher order  
133 selection" resulting in community-level adaptation(22), but simply that communities whose  
134 members have evolved to exploit ecological niches more completely or more efficiently are

135 both more productive and can be less readily invaded(9, 23, 24). Quantifying the respective  
136 roles of these mechanisms would require testing competitiveness of all individual community  
137 members, which is unfeasible in complex anaerobic communities such as these. However,  
138 both community- and individual species-level properties are likely to be important. First,  
139 mutualistic interactions are commonplace in methanogenic communities(15, 19, 20), and  
140 hence the fitness of one community member is intimately linked to that of co-occurring  
141 mutualistic partners. Second, both within-community diversity and microbial biomass  
142 positively correlated with methane production – a finding consistent with greater niche  
143 packing(14) (Figure 3). Third, the density of the organisms directly responsible for methane  
144 production, the methanogenic Archaea, did not correlate with methane production (Figure  
145 3A), further emphasizing the importance of interactions between taxa in explaining our  
146 results.  
147

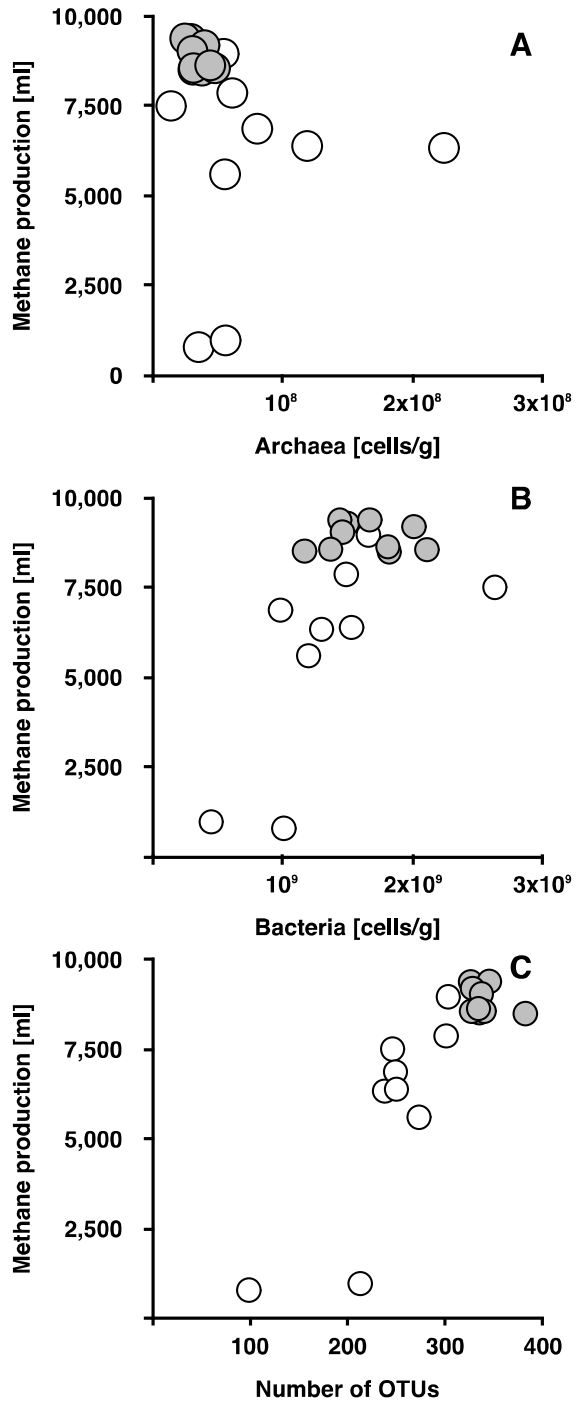

148

149

150 Figure 3: Within-community predictors of methane production. Relationships

151 between A) Archaeal densities [cells/g] ( $F_{1,15} = 0.32$ ,  $P > 0.2$ ) B) Bacterial densities

152 [cells/g] ( $F_{1,16} = 16.5$ ,  $P < 0.001$ ) and C) number of OTUs ( $F_{1,16} = 51.6$ ,  $P < 0.001$ )



153 and methane production [ml]. Note that qualitatively the same results apply when  
154 mixed communities are excluded from analyses.

155

156 The finding that coalescence can result in the most productive individual community to  
157 dominate the resulting mixed community has direct implications for biotechnological uses of  
158 microbial communities. Given that the best performing community in isolation largely  
159 determined both the composition and performance of mixtures of communities, we  
160 hypothesized that methane production in such biotechnological applications would increase  
161 with increasing number of communities in a mixture. We therefore inoculated laboratory-scale  
162 anaerobic digesters with 1, 2, 3, 4, 6 or 12 communities, ensuing that each of the 12 starting  
163 communities was only used once at each diversity level (see Extended Data Table 1). We  
164 found that cumulative methane production over a five-week period increased with increasing  
165 number of communities used as an inoculum (Figure 4). The positive correlation between  
166 community function and the number of inoculating communities is analogous to the commonly  
167 observed finding that community productivity increases with increasing species or genotype  
168 diversity in plant and microbial communities(24–26).

169

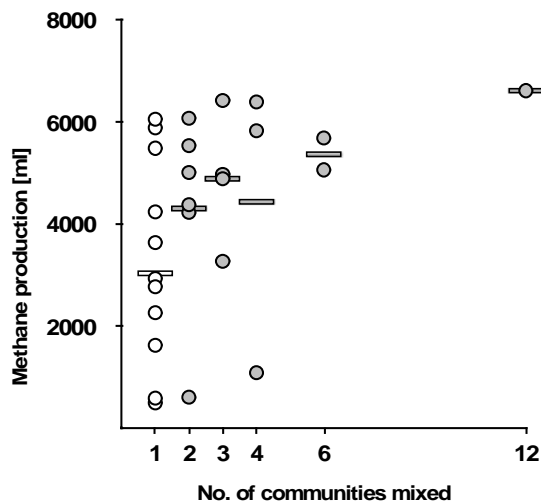

170

171

172 Figure 4: Cumulative methane production over time increases with number of inoculated  
173 communities. No single community was represented more than once at each diversity level,  
174 and there was a monotonic increase in methane production with number of communities used

175 ( $F_{1,26} = 5.4$ ,  $P = 0.03$ ). Individual communities (white circles) and their average methane  
176 production (white line) are compared with mixes of communities (grey circles) and their  
177 averages (grey line) at different numbers of communities used.

178

179 Here, we have shown that coalescence of microbial communities results in domination by a  
180 single community, and that the winning community can be predicted from its original  
181 productivity. These results have important implications for understanding the dynamics of  
182 microbial communities in biotechnological applications, in which communities are frequently  
183 mixed together, as well as microbiome-associated human health(17) and agriculture(18)  
184 related processes. Moreover, we have identified a way to significantly improve methane yield  
185 during anaerobic digestion, which is different from standard practice: inoculate digesters with  
186 a broad range of microbial communities. This is likely to ensure that the mixed inoculum  
187 contains a community reasonably closely adapted to the specific reactor conditions. This  
188 community will subsequently come to dominate and result and enhance methane production.  
189 This approach could be applied to a range of biotechnological processes driven by microbial  
190 communities, as well as to manipulate microbiomes in clinical(17) and agricultural(18)  
191 contexts.

192

193

194 References:

195

- 196 1. R. MacArthur, E. Wilson, An equilibrium theory of insular zoogeography. *Evolution* (N.  
197 Y). **17**, 373–387 (1963).
- 198 2. M. Vellend, Conceptual synthesis in community ecology. *Q. Rev. Biol.* **85**, 183–206  
199 (2010).
- 200 3. T. Kawecki, Adaptation to marginal habitats. *Annu. Rev. Ecol. Evol. Syst.* **39**, 321–342  
201 (2008).
- 202 4. M. Rillig, J. Antonovics, T. Caruso, A. Lehmann, Interchange of entire communities:  
203 microbial community coalescence. *Trends Ecol.* **30**, 470–476 (2015).
- 204 5. M. Rillig, A. Lehmann, C. Aguilar-Trigueros, Soil microbes and community  
205 coalescence. *Pedobiologia (Jena)*. **59**, 37–40 (2016).
- 206 6. M. Gilpin, Community-level competition: asymmetrical dominance. *Proc. Natl. Acad.*  
207 *Sci. U. S. A.* **91**, 3252–3254 (1994).
- 208 7. Y. Toquenaga, Historicity of a simple competition model. *J. Theor. Biol.* **187**, 175–181  
209 (1997).
- 210 8. C. Wright, Ecological community integration increases with added trophic complexity.  
211 *Ecol. Complex.* **5**, 140–145 (2008).
- 212 9. M. Tikhonov, Community-level cohesion without cooperation. *Elife*. **5**, e15747 (2016).
- 213 10. N. Hausmann, C. Hawkes, Plant neighborhood control of arbuscular mycorrhizal  
214 community composition. *New Phytol.* **183**, 1188–1200 (2009).
- 215 11. G. Livingston, Y. Jiang, J. Fox, M. Leibold, The dynamics of community assembly  
216 under sudden mixing in experimental microcosms. *Ecology*. **94**, 2898–2906 (2013).
- 217 12. C. Souffreau, B. Pecceu, C. Denis, An experimental analysis of species sorting and  
218 mass effects in freshwater bacterioplankton. *Freshwater*. **59**, 2081–2095 (2014).
- 219 13. H. Adams, B. Crump, G. Kling, Metacommunity dynamics of bacteria in an arctic lake:  
220 the impact of species sorting and mass effects on bacterial production and  
221 biogeography. *Front. Microbiol.* **5** (2014).
- 222 14. R. MacArthur, Species packing and competitive equilibrium for many species. *Theor.*  
223 *Popul. Biol.* **1**, 1–11 (1970).

- 224 15. J. Roughgarden, Resource partitioning among competing species—a coevolutionary  
225 approach. *Theor. Popul. Biol.* **9**, 388–424 (1976).
- 226 16. B. Schink, Energetics of syntrophic cooperation in methanogenic degradation.  
227 *Microbiol. Mol. Biol. Rev.* **61**, 262–280 (1997).
- 228 17. G. Reid *et al.*, Microbiota restoration: natural and supplemented recovery of human  
229 microbial communities. *Nat. Rev. Microbiol.* **9**, 27–38 (2011).
- 230 18. A. Sradnick, R. Murugan, M. Oltmanns, J. Raupp, R. G. Joergensen, Changes in  
231 functional diversity of the soil microbial community in a heterogeneous sandy soil after  
232 long-term fertilization with cattle manure and mineral fertilizer. *Appl. Soil Ecol.* **63**, 23–  
233 28 (2013).
- 234 19. K. Hillesland, D. Stahl, Rapid evolution of stability and productivity at the origin of a  
235 microbial mutualism. *Proc. Natl. Acad. Sci. U. S. A.* **107**, 2124–2129 (2010).
- 236 20. T. Großkopf, O. Soyer, Microbial diversity arising from thermodynamic constraints.  
237 *ISME J.* **10**, 2725–2733 (2016).
- 238 21. Q. Zhang, A. Buckling, Migration highways and migration barriers created by host–  
239 parasite interactions. *Ecol. Lett.* **19**, 1479–1485 (2016).
- 240 22. A. Gardner, A. Grafen, Capturing the superorganism: a formal theory of group  
241 adaptation. *J. Evol. Biol.* **22**, 659–671 (2009).
- 242 23. C. S. Elton, *The Ecology of Invasions by Animals and Plants* (Springer US, Boston,  
243 MA, 1958).
- 244 24. D. Tilman, C. Lehman, Plant diversity and ecosystem productivity: theoretical  
245 considerations. *Proc. Natl. Acad. Sci. U. S. A.* **94**, 1857–1861 (1997).
- 246 25. D. J. Hodgson, P. B. Rainey, A. Buckling, Mechanisms linking diversity, productivity  
247 and invasibility in experimental bacterial communities. *Proc. R. Soc. B Biol. Sci.* **269**,  
248 2277–2283 (2002).
- 249 26. T. Bell, J. J. A. Newman, B. B. W. Silverman, S. L. S. Turner, A. A. K. Lilley, The  
250 contribution of species richness and composition to bacterial services. *Nature.* **436**,  
251 1157–1160 (2005).

252 **Acknowledgements**

253 The work was funded by the BBSRC, project BB/K003240/1. AB is additionally funded by the  
254 Royal Society. KM & JH were funded through the project ENIGME from the INRA  
255 metaprogramme MEM (Meta-omics and microbial ecosystems). KM was additionally funded  
256 through an Institut Carnot 3BCAR international travel grant.

257

258

259 **Author Contributions**

260 AB, JH, KM, FB, OSS and PS conceived the study; FB and PS conducted the experiments  
261 PS, AB, MA, SB, DS analysed the data AB and PS wrote the manuscript and all authors  
262 contributed revisions.

263

264
